# Supplementary material for: A General Framework for Automated Accurate Calculation of b-Matrix (Auto-b) in Diffusion MRI Pulse Sequences
Source: Hindawi journal article supplement (doi:10.1155/2023/4610812), 2023-04-05
Supplement: f1 [file 4610812.f1.docx]

## (Supplementary Materials) An extension to Auto-*b* that provides support for numerical integration

Based on the divide-and-conquer approach, Auto-*b* supports the *b*-matrix calculation for a variety of waveforms. However, it requires that the waveform can be expressed by a series of subfunctions and that an integral function of each subfunction exists.

In this section, Auto-*b* has been extended to support numerical integration on a discrete representation of the waveforms, allowing the *b*-matrix to be calculated for more general waveforms. Two key issues need to be addressed: 1) how to convert gradient specifications into 3D discrete gradient data, and 2) how to calculate the *b*-matrix for discrete gradient data. Like the divide and conquer approach, Auto*-b* using numerical integration consists of five steps. The first two steps are the same for the framework of both approaches and the differences in the last three steps are described below:

*(1) Convert gradient specifications to 3D discrete gradient data*

Based on the given sampling frequency, the whole time is discretized into uniformly spaced points. Once the sampling time points are substituted into the piecewise function of original gradients, a discrete gradient time series for each axis is formed. Attributed to the same sampling frequency between different axes, the 3D discrete data can be formed by combining the discrete data of the three axes directly.

As the sign of the effective gradients changes in the presence of 180° refocusing pulses, the second guideline of segmentation in the divide-and-conquer approach is still valid for the numerical integration approach. Specifically, the 3D discrete data is further divided into several groups based on antiphase instants. In addition, control variables were used to constrain the time of the 3D discrete gradient data between the excitation and refocusing instants.

*(2) Generate the sequence diagram*

Using the 3D discrete gradient data, the sequence diagram can be plotted.

*(3) Calculate the b-matrix automatically*

Since the 3D discrete gradient data have been divided into several groups based on the antiphase instants, the discrete data of effective gradients can be obtained based on Equation 1. Once the whole time is discretized by a given sampling frequency, the focus becomes the calculation of the value for each sampling interval.

From the geometric sense, the definite integral is the sum of the areas of an infinite differential curve. By dividing the area into equally spaced trapezoids, the trapezoidal method is used to approximate the integration over an interval. For the integration of *N* equally spaced intervals, the approximation is expressed as follows:

(S1)

(S2)

where , , , and *0* = *t*0 < *t*1 < ... < *tN* = *TE*.

In summary, Auto-*b* has been enhanced to support numerical integration, allowing the b-matrix to be calculated for more general waveforms. After discretizing the waveform or providing discrete gradient data directly (especially for waveforms that cannot be described analytically), the *b*-matrix can be calculated using Equations S1-S2.
